# Supplementary material for: Myeloproliferative neoplasms can be initiated from a single hematopoietic stem cell expressing JAK2-V617F
Source: PubMed Central journal article supplement — J Exp Med. 2014 Oct 20;211(11):2213–30. doi: 10.1084/jem.20131371 (PMC4203945; doi:10.1084/jem.20131371), 2014-10-20
Supplement: supp_jem.20131371_JEM_20131371_sm.pdf [file supp_jem.20131371_JEM_20131371_sm.pdf]

SUPPLEMENTAL MATERIAL

Lundberg et al., <http://www.jem.org/cgi/content/full/jem.20131371/DC1>

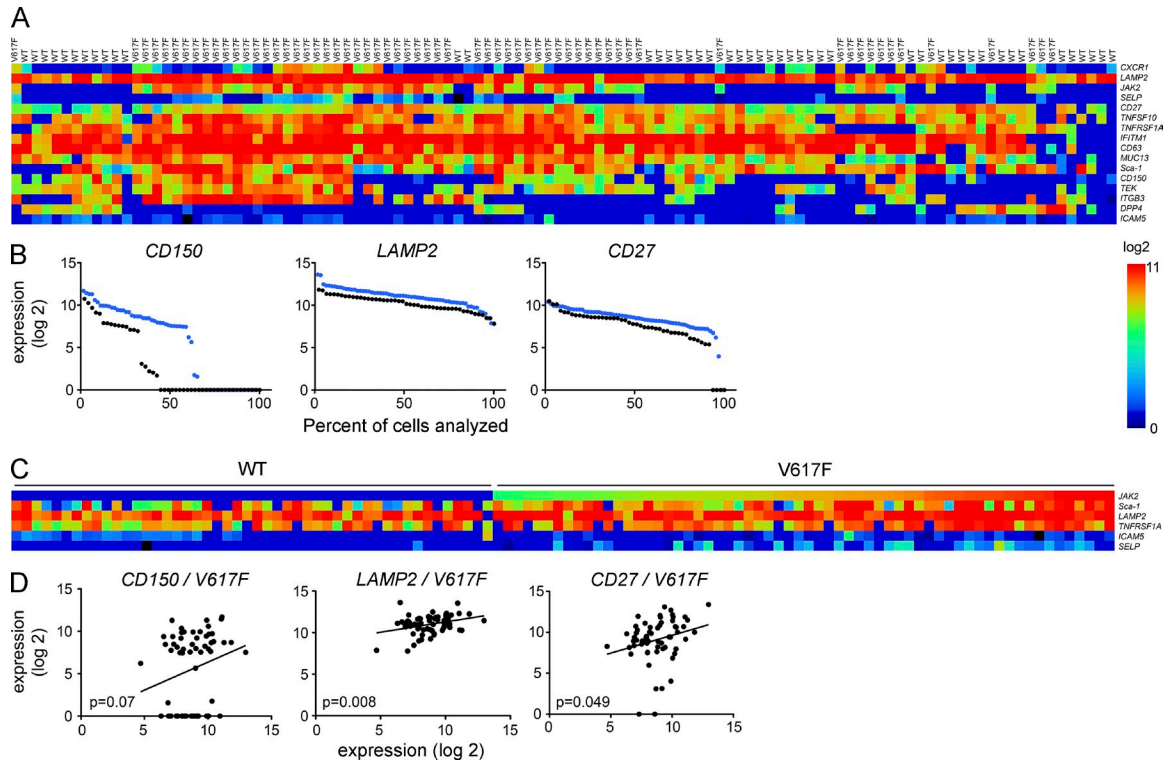

**Figure S1. Characterization of LT-HSCs FACS-sorted using the L<sup>int</sup>SK strategy by single cell expression profiling.** (A) Heat map of the hierarchical clustering showing expression levels of all genes differentially expressed between FACS-sorted V617F and WT single cells with a cutoff of  $P \leq 0.01$ . Data from two independent experiments are shown (total  $n = 47$  for WT cells and  $n = 63$  for V617F cells). (B) Comparison of the expression levels in single L<sup>int</sup> LT-HSCs of selected genes. Dots represent single cells and they are arranged according to decreasing expression. (C) Genes whose expression levels correlated with expression levels of JAK2-V617F. (D) Correlations between up-regulated genes and V617F are shown.

Table S1 is provided as an Excel file.
